# Supplementary material
Source: PubMed Central journal article supplement (PMC3173207)
Supplement: supp_M111.242586_jbc.M111.242586-3.pdf [file supp_M111.242586_jbc.M111.242586-3.pdf]

**Table S1.** Primer sequences used for 5'-RACE PCR cloning of *GjUGT1~13*.

| Primer name |          | Sequence (5' to 3')          |
|-------------|----------|------------------------------|
| GjUGT1      | 3R-Rv1   | TTGATCTTCATCGCTCTCTACTGTCCC  |
|             | 3R-Rv2   | CTTTGCATTGGTTCCTTGATCAGTCC   |
| GjUGT2      | 16'R-Rv1 | CCATCCCCTTTTCTCCAACCATCAACTC |
| GjUGT3, 4   | 5R-Rv1   | CATGAGTCTGCTTTCCACCAGAGG     |
|             | 5R-Rv2   | CACTTACCCCAACTTTCAGAACCTGAGC |
| GjUGT5      | 19F-Rv1  | CCACCTTCCAAACTTCCCCCACATAC   |
| GjUGT6      | 8F-Rv1   | CCTCTTCTCCATAAGGTCCCTCA      |
|             | 8F-Rv2   | CCATAAGGTCCCTCACCATCATCTCAAC |
| GjUGT7      | 23R-Rv1  | TGGATGTCACAAGTTCCTCTCGCC     |
|             | 23R-Rv2  | TCAGACCAATCTTCAGCACCTTCTCCAG |
| GjUGT8      | 2R-Rv1   | CCTCTTGATCTCTTCTCTCTCCACCACC |
|             | 2R-Rv2   | CTCTTCTCTCTCCACCACCCTGCTTC   |
| GjUGT9      | 4R-Rv1   | CCAGTCTCGTCTTTCACAACCTCCATGC |
|             | 4R-Rv2   | ACAACCTCCATGCCTGCACCAATTTCC  |
| GjUGT10     | 7F-Rv1   | CCAATGCGATTTCCACAGACAATTCGAG |
| GjUGT11     | 8'R-Rv1  | GCCATCCCCAAGTCTTTCAGCAGGA    |
| GjUGT12     | 1F-Rv1   | TGTCTCTCGTCTTCTGGCTCAGCTTTC  |
|             | 1F-Rv2   | TTTCTCCACCTCCTCCCCTCTCACA    |
| GjUGT13     | 46F-Rv1  | TGCCTTTCTCTACTTGCTCGGCTCTG   |
|             | 46F-Rv2  | GCTCTGACCAAAGCTTGATTTCCCTTTC |
