# Supplementary material
Source: PubMed Central journal article supplement (PMC3173207)
Supplement: supp_M111.242586_jbc.M111.242586-4.pdf [file supp_M111.242586_jbc.M111.242586-4.pdf]

**Table S2.** Primer sequences used for full-length amplification of *GjUGT1~13*.

| Primer name |          | Sequence (5' to 3')             |
|-------------|----------|---------------------------------|
| GjUGT1      | 3-6Fw3   | GCTGCTAAAAATGGTGCAACAAAGACAT    |
|             | 3-6Rv1   | CACCAATCTACAACACTAGTTTGGACTCAGC |
| GjUGT2      | 16'-3Fw1 | GCAATGGGTTCCATTTCTCTGCC         |
|             | 16'-3Rv1 | GCTATTCTGATTTTACTTGGAGAGAAGC    |
| GjUGT3      | 5-4Fw3   | GAAATGCTTCCCAAAGTACACATGG       |
|             | 5-1Rv1   | GACAACATAATGACTGCTCATACCAAAGG   |
| GjUGT4      | 5-1Fw3   | GATTATGGAATTGGTGGAAAATGCTAACC   |
|             | 5-1Rv1   | GACAACATAATGACTGCTCATACCAAAGG   |
| GjUGT5      | 19F-8Fw1 | CATGGATAACCATCAAAAGCCGTCAAGC    |
|             | 19F-8Rv1 | GTGGTTAACTGGGAGGAGTAACGAG       |
| GjUGT6      | 8-2Fw    | GACATGGATAACCATCAAAAGCCGTCAAG   |
|             | 8-2Rv    | ACATAATCACCAAAGTGGCTTTTTTCAGGC  |
| GjUGT7      | 23-6Fw   | CCAAATCCTTCCAATGGCCAAAGAC       |
|             | 23-6Rv   | GAACAGAAAATCTAGCGACGAATATGAGC   |
| GjUGT8      | 2-12Fw1  | CCATCATGAAGAAGCCTCAACACTTTCTC   |
|             | 2-12Rv1  | GAAAAGGGTTCTTATTCTATCCCAGAC     |
| GjUGT9      | 4-1Fw1   | CAGCTCAAGGTCCTCATGTTTCCAT       |
|             | 4-1Rv1   | GCTCAAATCATTCCGGAAAGGTACTC      |
| GjUGT10     | 7-5Fw1   | GATGGGCCATTTGGCTCAGCTGGT        |
|             | 7-5Rv1   | CTAAGGGCATGTTAAAACAGCATACCTC    |
| GjUGT11     | 8'-1Fw1  | GAGGAAGAAATGAAGAACCAAGAGCTG     |
|             | 8'-1Rv1  | CAGATGTCAGATCCGACAAACAGTCA      |
| GjUGT12     | 1-3Fw1   | GAAGATGGAGAATAACCTTGTCCTG       |
|             | 1-3Rv1   | GCTGGGGAATTTTGGCTGCTTTTAGT      |
| GjUGT13     | 46-5Fw1  | CTTTAGCTTCTTCTCCTCTAGCAAATGG    |
|             | 46-5Rv1  | CACAGCACCAATTAAGCTCAAGACC       |
