# Supplementary material
Source: PubMed Central journal article supplement (PMC3173207)
Supplement: supp_M111.242586_jbc.M111.242586-5.pdf [file supp_M111.242586_jbc.M111.242586-5.pdf]

**Table S3.** Primer sequences used for heterologous expression of GjUGT1~13.

| Primer name | Sequence (5' to 3')                                             |
|-------------|-----------------------------------------------------------------|
| GjUGT1      | SphI-3-6Fw <u>GGGCATGC</u> ATGGTGCAACAAAGACATGTTCTCCTCA         |
|             | HindIII-3-6Rv CCA <u>AAGCTT</u> CTAGTTTGACTCAGCTTGATAACCTTTTCC  |
| GjUGT2      | SphI-16'-3Fw <u>CCGCATGC</u> ATGGGTTCCATTTCTCTGCCAGAAAAGC       |
|             | HindIII-16'-3Rv CCA <u>AAGCTT</u> TTACTTGGAGAGAAGCACTTGGACAACCT |
| GjUGT3      | SphI-5-4Fw <u>GGGCATGC</u> ATGCTTCCCAAAGTACACATGGCCG            |
|             | PstI-5-4Rv <u>GGCTGCAG</u> CTAATGACTGCTCATACCAAAGGCACGTAG       |
| GjUGT4      | SphI-5-1Fw <u>CGGCATGC</u> ATGGAATTGGTGGAAAATGCTAACCTTC         |
|             | PstI-5-4Rv <u>GGCTGCAG</u> CTAATGACTGCTCATACCAAAGGCACGTAG       |
| GjUGT5      | BamHI-8-2Fw <u>CGGGATCC</u> ATGGATAACCATCAAAGCCGTCAAGCAC        |
|             | SacI-8-2Rv <u>CGGAGCTC</u> TCACCAAAGTGGCTTTTTTCAGGCTCATC        |
| GjUGT6      | BamHI-8-2Fw <u>CGGGATCC</u> ATGGATAACCATCAAAGCCGTCAAGCAC        |
|             | SacI-8-2Rv <u>CGGAGCTC</u> TCACCAAAGTGGCTTTTTTCAGGCTCATC        |
| GjUGT7      | SphI-23-6Fw <u>CCGCATGC</u> ATGGCCAAAGACGATCATTCCACAG           |
|             | HindIII-23-6Rv CCA <u>AAGCTT</u> ATCTAGCGACGAATATGAGCAATGAAAGAA |
| GjUGT8      | SphI-2-12Fw <u>CCGCATGC</u> ATGAAGAAGCCTCAACACTTTCTCATAAC       |
|             | HindIII-2-12Rv <u>GGAAGCTT</u> CTATCCCAGACTCTCTAAGAAAAGTTTGAG   |
| GjUGT9      | SphI-4-1Fw <u>CCGCATGC</u> ATGTTTCCATGGCTGGCTTATGGC             |
|             | HindIII-4-1Rv CCA <u>AAGCTT</u> TTAATTCGAAGACTGAGTAGTTTCCGTCAC  |
| GjUGT10     | SphI-7-5Fw <u>CCGCATGC</u> ATGGGCCATTTGGCTCAGCTGGT              |
|             | HindIII-7-5Rv <u>GGAAGCTT</u> TCAACTACCATGCAACATTTTACCAATCAG    |
| GjUGT11     | SphI-8'-1Fw <u>CCGCATGC</u> ATGAAGAACCAAGAGCTGGTTTTTCATTCC      |
|             | SalI-8'-1Rv <u>GCGTCGAC</u> TCATGGAATATTATCTATCAACGCATCTAG      |
| GjUGT12     | BamHI-1-3Fw <u>CCGGATCC</u> ATGGAGAATACCCTTGTCCTGTATCC          |
|             | SacI-1-3Rv <u>CGGAGCTC</u> TTAGTTTCCAAACACAACGTGAATCAAGC        |
| GjUGT13     | BamHI-46-5Fw <u>GCGGATCC</u> ATGGAGAAATTTAAGCTCATGATGATGGT      |
|             | SacI-46-5Rv <u>GCGAGCTC</u> TCAAGACCTTGAACAAATATCTTGAATAAT      |

Sequences shown in underline correspond to restriction enzyme sites that facilitated cloning.
