# Supplementary material
Source: PubMed Central journal article supplement (PMC3173207)
Supplement: supp_M111.242586_jbc.M111.242586-6.pdf [file supp_M111.242586_jbc.M111.242586-6.pdf]

**Table S4.** Accession numbers of PSPGs used for constructing the phylogenetic tree shown in Figure 4.

| Name                | Species                            | Function                                                                       | Accession No. |
|---------------------|------------------------------------|--------------------------------------------------------------------------------|---------------|
| GjUGT1              | <i>Gardenia jasminoides</i>        | Crocin glucosyltransferase                                                     | AB555731      |
| GjUGT2 (UGT85A24)   |                                    | Iridoid 1- <i>O</i> -glucosyltransferase                                       | AB555732      |
| GjUGT3              |                                    |                                                                                | AB555733      |
| GjUGT4              |                                    |                                                                                | AB555734      |
| GjUGT5              |                                    |                                                                                | AB555735      |
| GjUGT6              |                                    |                                                                                | AB555736      |
| GjUGT7              |                                    |                                                                                | AB555737      |
| GjUGT8              |                                    |                                                                                | AB555738      |
| GjUGT9              |                                    |                                                                                | AB555739      |
| GjUGT10             |                                    |                                                                                | AB555740      |
| GjUGT11             |                                    |                                                                                | AB555741      |
| GjUGT12             |                                    |                                                                                | AB555742      |
| GjUGT13             |                                    |                                                                                | AB555743      |
| CrUGT6 (UGT85A23)   | <i>Catharanthus roseus</i>         | Iridoid 1- <i>O</i> -glucosyltransferase                                       | AB591741      |
| ABA-GT              | <i>Vigna angularis</i>             | Abscisic acid glucosyltransferase                                              | BAB83692      |
| B5GT (UGT73A5)      | <i>Dorotheanthus bellidiformis</i> | Betanidin 5- <i>O</i> -glucosyltransferase                                     | Y18871        |
| BpUGAT              | <i>Bellis perennis</i>             | Anthocyanidin 3- <i>O</i> -glucoside<br>1,2- <i>O</i> -glucuronosyltransferase | BAD77944      |
| Cm1,2RhaT           | <i>Citrus maxima</i>               | Flavanone 7- <i>O</i> -glucoside<br>1,2- <i>O</i> -rhamnosyltransferase        | AAL06646      |
| CrYmb4              | <i>Catharanthus roseus</i>         | Tetrahydrochalcone<br>2'- <i>O</i> -glucosyltransferase                        | AB294401      |
| EpGT2               | <i>Eucalyptus perriniana</i>       | Monoterpene glucosyltransferase                                                | AB166766      |
| FaGT6               | <i>Fragaria</i> × <i>ananassa</i>  | Flavonoid 3- <i>O</i> -glucosyltransferase                                     | DQ289587      |
| F7GT                | <i>Scutellaria baicalensis</i>     | Flavonoid 7- <i>O</i> -glucosyltransferase                                     | BAA83484      |
| Gentiana 3'GT       | <i>Gentiana triflora</i>           | Flavonoid 3'- <i>O</i> -glucosyltransferase                                    | AB076697      |
| In3GGT              | <i>Ipomoea nil</i>                 | Anthocyanidin 3- <i>O</i> -glucoside<br>1,2- <i>O</i> -glucosyltransferase     | AB192314      |
| MdPGT1              | <i>Malus pumila</i>                | Phloretin 2'- <i>O</i> -glucosyltransferase                                    | EU246349      |
| Medicago UGT71G1    | <i>Medicago truncatula</i>         | Flavonoid 3'- <i>O</i> -glucosyltransferase                                    | AAW56092      |
| Medicago UGT85H2    |                                    | (Iso)flavonoid glucosyltransferase                                             | DQ875463      |
| NtGT1a              | <i>Nicotiana tabacum</i>           | Glucosyltransferase with broad substrate<br>specificity                        | AB052558      |
| NtGT2               |                                    | Flavonol 7- <i>O</i> -, coumarin 3- <i>O</i> -<br>glucosyltransferase          | AB072919      |
| NtGT3               |                                    | Glucosyltransferase with broad substrate<br>specificity                        | AB072918      |
| NtSAGT              |                                    | Salicylic acid glucosyltransferase                                             | AAF61647      |
| Petunia UGT79A1     |                                    | Anthocyanidin 3- <i>O</i> -glucoside<br>1,6- <i>O</i> -rhamnosyltransferase    | CAA50376      |
| Prunus UGT85A19     | <i>Prunus dulcis</i>               | Mandelonitrile glucosyltransferase                                             | EU015987      |
| SaGT4A              | <i>Solanum aculeatissimum</i>      | Steroidal sapogenin 3- <i>O</i> - glucosyltransferase                          | BAD89042      |
| Sesamum UGT94D1     | <i>Sesamum indicum</i>             | Sesaminol 2- <i>O</i> -glucoside<br>1,6- <i>O</i> -glucosyltransferase         | BAF99027      |
| Sorghum UGT85B1     | <i>Sorghum bicolor</i>             | Cyanohydrin <i>O</i> -glucosyltransferase                                      | AAF17077      |
| Stevia UGT76G1      | <i>Stevia rebaudiana</i>           | Stevioside glucosyltransferase                                                 | AAR06912      |
| Stevia UGT85C2      |                                    | Steviol 13- <i>O</i> -glucosyltransferase                                      | AAR06920      |
| UGTCs2              | <i>Crocus sativus</i>              | Crocin glucosyltransferase                                                     | AAP94878      |
| UGT71C1 (At2g29750) | <i>Arabidopsis thaliana</i>        | Phenylpropanoid <i>O</i> -glucosyl transferase                                 | AAC35226      |
| UGT72E2 (At5g66690) |                                    | Coniferyl alcohol glucosyltransferase                                          | BAA97275      |
| UGT74B1 (At1g24100) |                                    | Thiohydroximate 5- <i>O</i> -glucosyl transferase                              | AAC00570      |

|                     |                           |                                            |          |
|---------------------|---------------------------|--------------------------------------------|----------|
| UGT75B1 (At1g05560) |                           | Indole-3-acetate glucosyltransferase       | AF196777 |
| UGT76C1 (At5g05870) |                           | Cytokinin <i>N</i> -glucosyltransferase    | BAB10792 |
| UGT78D1 (At1g30530) |                           | Flavonol 3- <i>O</i> -rhamnosyltransferase | AAF19756 |
| UGT85A1 (At1g22400) |                           | <i>trans</i> -Zeatin glucosyltransferase   | AAF18537 |
| VvGT1               | <i>Vitis vinifera</i>     | flavonoid 3- <i>O</i> -glucosyltransferase | AAB81682 |
| ZOG1                | <i>Phaseolus lunatus</i>  | <i>cis</i> -Zeatin glucosyltransferase     | AAD04166 |
| ZOX1                | <i>Phaseolus vulgaris</i> | <i>cis</i> -Zeatin xylosyltransferase      | AAD51778 |

---
