# Supplementary material
Source: PubMed Central journal article supplement (PMC3173207)

Figure S1

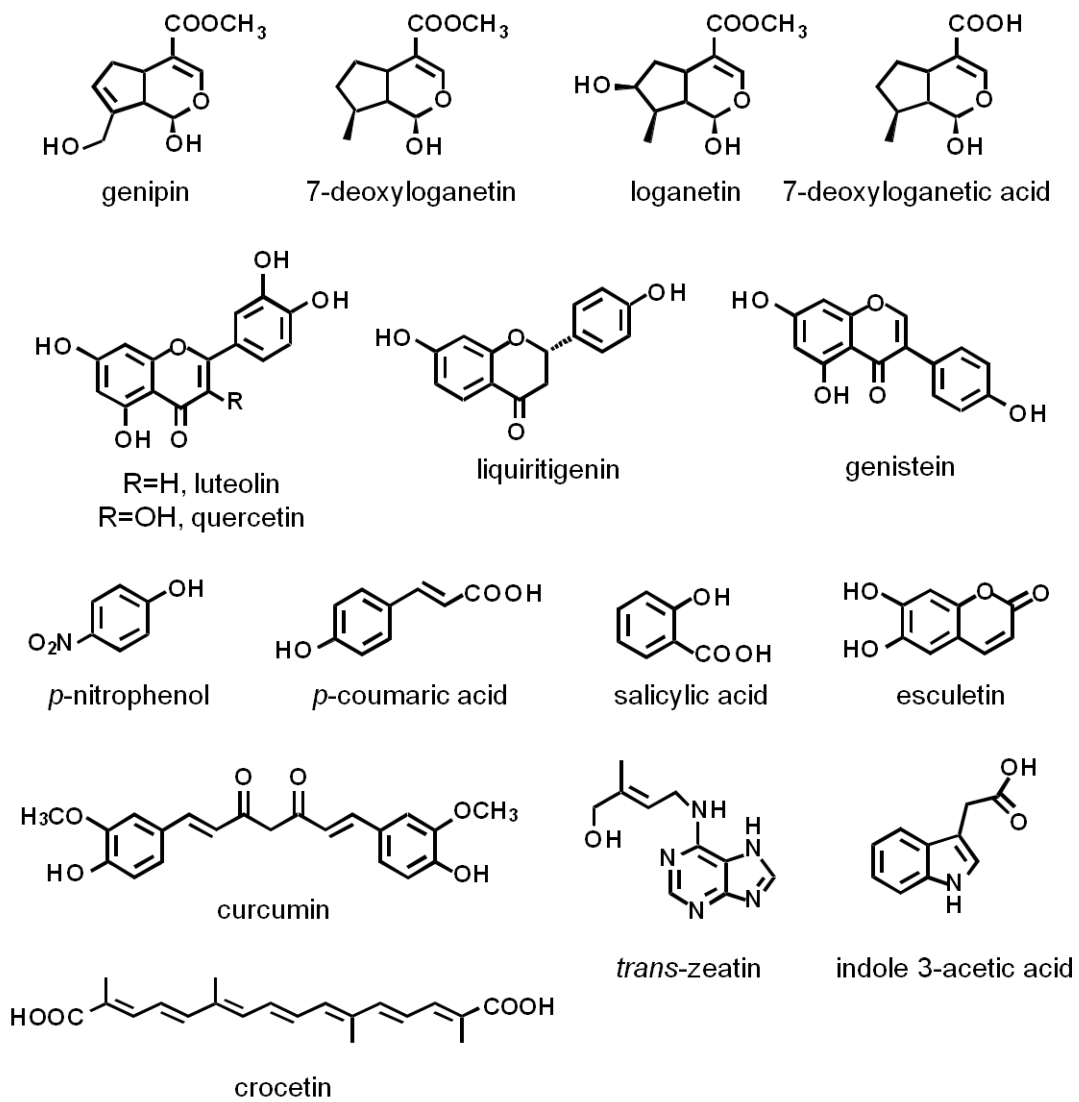

Supplement: supp_M111.242586_jbc.M111.242586-1.pdf [file supp_M111.242586_jbc.M111.242586-1.pdf]

Figure S2

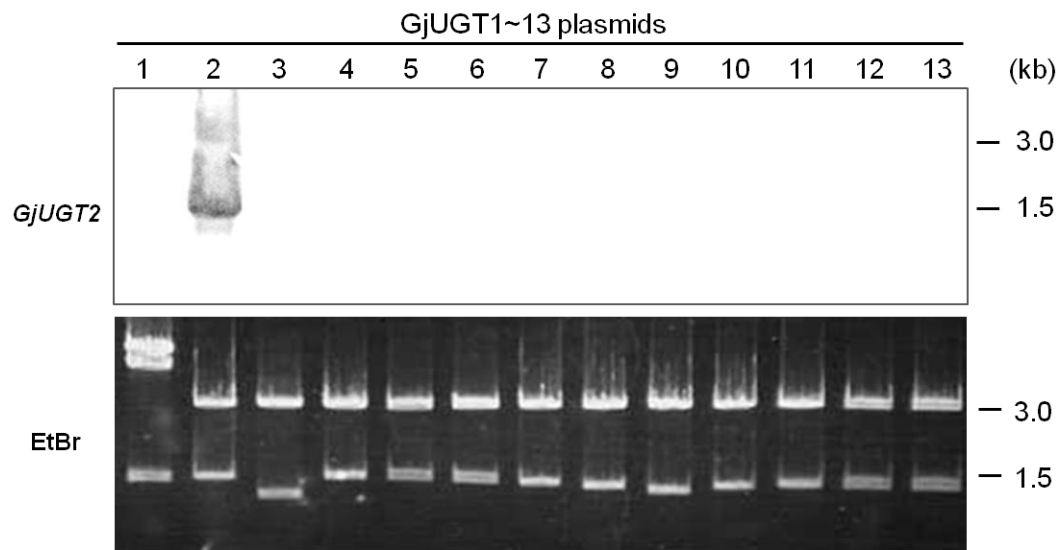

Supplement: supp_M111.242586_jbc.M111.242586-2.pdf [file supp_M111.242586_jbc.M111.242586-2.pdf]
